# Supplementary material for: Intermittent catheterisation with hydrophilic and non-hydrophilic urinary catheters: systematic literature review and meta-analyses
Source: Springer Nature journal article supplement (doi:10.1186/s12894-016-0191-1), 2017-01-10
Supplement: MOESM1 [file 11992148]

|                          | Random sequence generation (selection bias) | Allocation concealment (selection bias) | Blinding of participants and personnel (performance bias) | Blinding of outcome assessment (detection bias) | Incomplete outcome data (attrition bias) | Selective reporting (reporting bias) |
|--------------------------|---------------------------------------------|-----------------------------------------|-----------------------------------------------------------|-------------------------------------------------|------------------------------------------|--------------------------------------|
| Cardenas 2009            | ?                                           | ?                                       | +                                                         | ?                                               | +                                        | +                                    |
| Cardenas 2011            | +                                           | +                                       | +                                                         | ?                                               | -                                        | +                                    |
| De Ridder 2005           | +                                           | +                                       | +                                                         | ?                                               | -                                        | +                                    |
| Pachler 1999 (reused)    | ?                                           | ?                                       | +                                                         | ?                                               | +                                        | +                                    |
| Sarica 2010              | +                                           | ?                                       | +                                                         | ?                                               | -                                        | +                                    |
| Sutherland 1996 (reused) | ?                                           | ?                                       | +                                                         | ?                                               | +                                        | +                                    |
| Wyndaele 2000            | ?                                           | ?                                       | ?                                                         | ?                                               | +                                        | +                                    |

Supplementary Figure 1 – Risk of bias summary: judgments regarding risks of bias for each study included in the systematic review (n=7). The symbol “+” represents low risk of bias, the symbol “?” represents unclear risk of bias and the symbol “-” represents high risk of bias.
