# Supplementary material for: Intermittent catheterisation with hydrophilic and non-hydrophilic urinary catheters: systematic literature review and meta-analyses
Source: Springer Nature journal article supplement (doi:10.1186/s12894-016-0191-1), 2017-01-10
Supplement: MOESM2 [file 11992148]

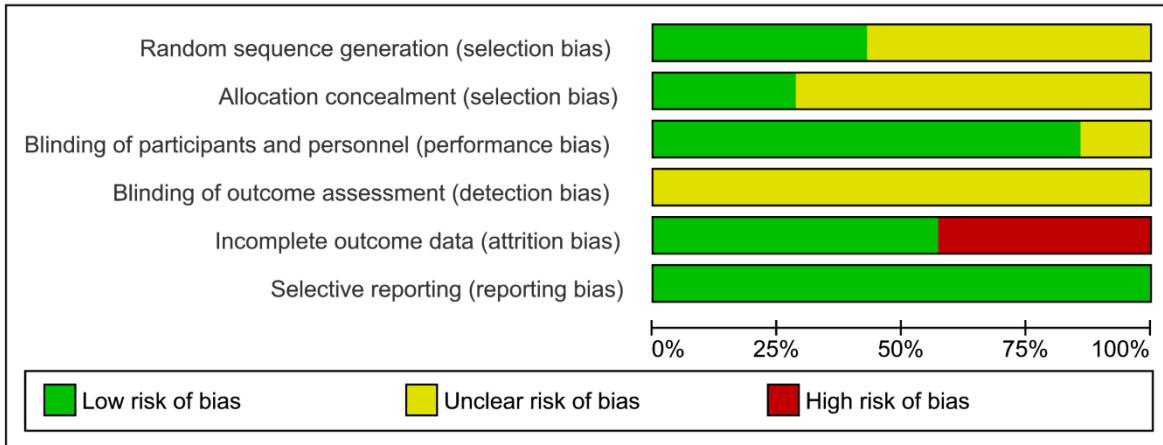

Supplementary Figure 2 – Risk of bias graph: judgments regarding risks of bias presented as percentages across all studies included in the systematic review (n=7). This figure illustrates, for each considered bias domain, the proportion of studies falling in each category of risk (low risk of bias, high risk of bias, unclear risk of bias).
